# Supplementary material
Source: PubMed Central journal article supplement (PMC6456856)
Supplement: JB.00007-19-s0001.pdf [file JB.00007-19-s0001.pdf]

1  
2  
3  
4  
5  
6  
7

Analysis of the Messenger RNAs in Spores of *Bacillus subtilis*

George Korza<sup>1</sup>, Emily Camilleri<sup>1</sup>, Joshua Green<sup>1</sup>, Janelle Robinson<sup>1</sup>, Katja Nagler<sup>2,3</sup>, Ralf  
Moeller<sup>4</sup>, Melissa J. Caimano<sup>1,5</sup> and Peter Setlow<sup>1#</sup>

Supplemental Material

8

## References

- 9 1. Nagler K, Krawczyk AO, De Jong A, Madela K, Hoffmann T, Laue M, Kuipers OP, Bremer E,  
10 Moeller R. 2016. Identification of differently expressed genes during *Bacillus subtilis* spore  
11 outgrowth in high-salinity environments using RNA sequencing. *Front Microbiol* 7:1564.
- 12 2. Swarge BN, Roseboom W., Zheng L. Abhyankar WR, Brul S, de Koster CG, de Koning LJ.  
13 2018. "One-Pot" sample processing method for proteome-wide analysis of microbial cells and  
14 spores. *Proteomics Clin Appl* 12:e1700169.
- 15 3. Zheng L. Abhyankar W, Ouwerling N, Dekker HL, van Veen H, Rosenboom W, de Koning, L,  
16 Brul S, de Koster CG. 2016. *Bacillus subtilis* spore inner membrane proteome. *J Proteome Res*  
17 15:585-594.

18

19  
20  
21  
22  
23  
24  
25  
26  
27  
28  
29  
30  
31  
32  
33  
34  
35  
36  
37

Table S1

Characteristics of RNA-seq data in the current work

| <b>Sample</b>        | <b>Description*</b> | <b>Total reads</b> | <b># aligned</b> | <b># unique</b> | <b># not aligned</b> | <b>% Unique aligned</b> | <b>Avg depth</b> |
|----------------------|---------------------|--------------------|------------------|-----------------|----------------------|-------------------------|------------------|
| 1-1DPL               | Plates-1d-dc        | 14766388           | 14525805         | 14472994        | 293394               | 99.64                   | 34               |
| 2-7DPL               | Plates-7d-hp-dc     | 14752008           | 14563140         | 14509380        | 242628               | 99.63                   | 23               |
| 4-7DL                | Liquid-7d-hp-dc     | 12315554           | 12167080         | 12129116        | 186438               | 99.69                   | 19               |
| Setlow_2018_08_27_S1 | Plates-7d-hp        | 14721666           | 11028926         | 10217288        | 4504378              | 92.64                   | 307              |
| Setlow_2018_08_27_S2 | Plates-7d-hp        | 14055316           | 11363461         | 10652056        | 3403260              | 93.74                   | 1161             |
| Setlow_2018_08_27_S3 | Plates-7d-hp        | 12932458           | 12538604         | 12393640        | 538818               | 98.84                   | 238              |
| Setlow_2018_10_31_S1 | Liquid-7d-lp        | 17290054           | 15800103         | 15735356        | 1554698              | 99.59                   | 401              |
| Setlow_2018_10_31_S2 | Liquid-7d-lp        | 19099550           | 18494815         | 18452576        | 646974               | 99.77                   | 109              |
| Setlow_2018_10_31_S3 | Liquid-7d-hp        | 14277172           | 13927158         | 13891238        | 385934               | 99.74                   | 96               |

\* Abbreviations used are: d, day; dc, chemically decoated; hp, highly purified; and lp, less well purified, with the regimens for spore production and purification described in Methods. The number of days indicates how long spores were held at 4°C while they were being purified.

38

Table S2\*

39 Most abundant *B. subtilis* spore mRNAs identified in published work, their  $\sigma$ -factor dependence

40 and whether encoded proteins have been detected in spores

| 41 | <u>1</u>    |             | <u>2</u>    |             | <u>3</u>    |     |
|----|-------------|-------------|-------------|-------------|-------------|-----|
| 42 | Gene        | $\sigma^G$  | Gene        | $\sigma^G$  | Gene        |     |
| 43 |             | dependence? |             | dependence? |             |     |
| 44 | <i>sspF</i> | yes         | <i>yhcQ</i> | yes         | <i>yoZQ</i> | yes |
| 45 | <i>yfhD</i> | yes         | <i>yjzC</i> | yes         | ybxF        | no  |
| 46 | <i>yrzQ</i> | yes         | <i>ypzI</i> | yes         | ypzE        | no  |
| 47 | <i>ytzL</i> | yes         | rpmA        | no          | <i>yrrD</i> | yes |
| 48 | <i>ypzG</i> | yes         | <i>yhcM</i> | yes         | <i>sspH</i> | yes |
| 49 | <i>ykzP</i> | yes         | <i>yxeD</i> | yes         | mtlF        | no  |
| 50 | <i>sspE</i> | yes         | <i>yuzA</i> | yes         | iseA        | no  |
| 51 | <i>yhcV</i> | yes         | <i>yhcN</i> | yes         | licH        | no  |
| 52 | <i>ypzF</i> | yes         | <b>ytzK</b> | yes         | mtlD        | no  |
| 53 | <i>sspM</i> | yes         | gmuB        | no          | tatAY       | no  |
| 54 | <i>ykzE</i> | yes         | <i>sspD</i> | yes         | ylqC        | no  |
| 55 | <i>ytzC</i> | yes         | gmuA        | no          | <i>rpsR</i> | no  |
| 56 | <i>sspA</i> | yes         | ysxB/prp    | no          | veg         | no  |
| 57 | <i>yqfX</i> | yes         | <i>rpsU</i> | no          | rpmH        | no  |
| 58 | <i>sspB</i> | yes         | <i>rplU</i> | no          | <i>yfhS</i> | yes |
| 59 | <i>sspK</i> | yes         | sboA        | no          | <i>rpsO</i> | no  |
| 60 | <i>sspN</i> | yes         | <i>licA</i> | no          | gmuC        | no  |
| 61 | <i>sspJ</i> | yes         | <b>sspL</b> | yes         | <b>ykzD</b> | yes |

|    |                    |     |                    |     |                    |     |
|----|--------------------|-----|--------------------|-----|--------------------|-----|
| 62 | <i>sspO</i>        | yes | <i>rpsT</i>        | no  | <i>yzkV</i>        | no  |
| 63 | <i>tlp</i>         | yes | <b><i>yoyE</i></b> | yes | <i>yhfH</i>        | no  |
| 64 | <i>yzcC</i>        | yes | <i>licB</i>        | no  | <b><i>yusG</i></b> | yes |
| 65 | <i>coxA</i>        | yes | <i>yyzE</i>        | no  | <i>rbfA</i>        | no  |
| 66 | <b><i>ymfJ</i></b> | yes | <i>abrB</i>        | no  | <i>mleA</i>        | no  |
| 67 | <b><i>yrzR</i></b> | yes | <i>yxiE</i>        | no  | <i>yrhC</i>        | no  |
| 68 | <b><i>yhdB</i></b> | yes | <i>rpsP</i>        | no  | <i>bglA</i>        | no  |
| 69 | <b><i>sspP</i></b> | yes | <i>rpsF</i>        | no  | <b><i>sspI</i></b> | yes |

70 \*Data are from reference 1 in order of mRNA abundance in columns 1-3;  $\sigma^G$ -dependence was  
71 determined as described in Methods; note that some  $\sigma^G$ -dependent genes are also transcribed under  
72  $\sigma^F$  control. mRNAs from genes in bold were detected in the most abundant 78 mRNAs determined  
73 in the current work by RNA-seq on RNA from spores prepared on plates and highly purified. The  
74 proteins from italicized genes have been identified in *B. subtilis* spores (2,3).

75

Table S3\*

76 Average molecules/spore for different abundance mRNAs in less well purified *B. subtilis* spores

| 77 | A                  | B          | C                         | D                                   | E                              | F                            | G                                              | H                     |       |
|----|--------------------|------------|---------------------------|-------------------------------------|--------------------------------|------------------------------|------------------------------------------------|-----------------------|-------|
| 78 | Avg RPKM/<br>Group | Genes<br># | Length<br>nt <sup>1</sup> | RPKM<br>Reads/<br>gene <sup>2</sup> | RelmRNAs/<br>gene <sup>3</sup> | mRNA nt/<br>spo <sup>4</sup> | mRNA nt/<br>spo ( $\Sigma=10^6$ ) <sup>5</sup> | mRNA/spo <sup>6</sup> |       |
| 81 | >1300              | 37         | 327                       | 1.2x10 <sup>5</sup>                 | 3.8x10 <sup>4</sup>            | 7170                         | 8.7x10 <sup>7</sup>                            | 9.9x10 <sup>5</sup>   | 86    |
| 82 | 290-1299           | 14         | 304                       | 455                                 | 138                            | 26                           | 1.1x10 <sup>5</sup>                            | 1300                  | 0.5   |
| 83 | 29-289             | 67         | 652                       | 69                                  | 45                             | 8.5                          | 3.7x10 <sup>5</sup>                            | 4200                  | 0.13  |
| 84 | 3-28               | 474        | 880                       | 6                                   | 5.3                            | 1                            | 4.2x10 <sup>5</sup>                            | 4800                  | 0.013 |
| 85 | Total = 592        |            |                           |                                     |                                |                              |                                                |                       |       |

86 \*RPKM values are from RNA-seq analysis on two RNA preparation isolated from dormant *B.*  
87 *subtilis* 168 spores (spo) prepared in liquid and less well purified as described in Methods. Values  
88 in Columns B-E and H are averages for all mRNAs in a group, while values in Columns A, F and  
89 G are totals for all genes or mRNAs in a group.

90 <sup>1</sup>mRNAs lengths were adjusted for the presence of 5'- and 3'-non-coding sequences by adding 50  
91 nt as described in the legend to Table 2.

92 <sup>2</sup>Reads/gene are average RPKM values corrected for the average length of mRNAs in this group  
93 as (C x B/1000). These values are the relative number of mRNAs for genes in each group.

94 <sup>4</sup>RelmRNAs/gene are relative levels of individual mRNAs in groups calculated as D/average  
95 Reads/gene value for the mRNAs in the lowest abundance group which was set as 1.

96 <sup>5</sup>Values for mRNA nt/spore were calculated as (E x A x B) for each group.

97 <sup>6</sup>Calculated as (F x 0.01138) to get a total of 10<sup>6</sup> nt for all 4 groups.

98 <sup>7</sup>These values were calculated as (G/A x B), and are the average numbers of individual  
99 mRNA/spore in each group.

100 Supplemental Figure Legends.

101 Fig. S1. Graphical representation of mapped read data for all genes. The y-axis indicates RPKM  
102 values for individual genes (*x*-axis). Genes are sorted based on RPKM values in descending order.  
103 Graphs in panels A and C are based on the average (avg) RPKM values from at least 2 biologically-  
104 independent dormant spore preparations, while data for panels B and D-F represent RPKM values  
105 with individual spore samples. Abbreviations are: d, day; dc, chemically decoated; hp, highly  
106 purified; and lp, less well purified. The regimens for spore production and purification are  
107 described in Methods. The number of d indicates how long spores were held at 4°C while they  
108 were being purified.

109

110 Fig. S2. Representative cartoons depicting read coverage from RNA-seq on RNA from sample  
111 Setlow\_2018\_08\_27\_S1 (Plates-7d-hp), generated using MacVector Assembler software. Green  
112 arrows are used to indicate genes of interest and orientation. Genome coordinates are indicated in  
113 red. Cumulative mapped read data for a given gene are shaded light blue. The y-axis for each  
114 plot indicates the average running read depth. Regions with no mapped reads are shaded pale  
115 green.

116

117 Fig. S3. High Sensitivity RNA ScreenTape analysis of total RNA from mid log phase *B. subtilis*  
118 vegetative cells grown in LB medium and dormant spores prepared on plates and highly purified  
119 over 7 d at 4°C. RNA samples were run on an Agilent TapeStation 4200 instrument.

120 Fig. S1.

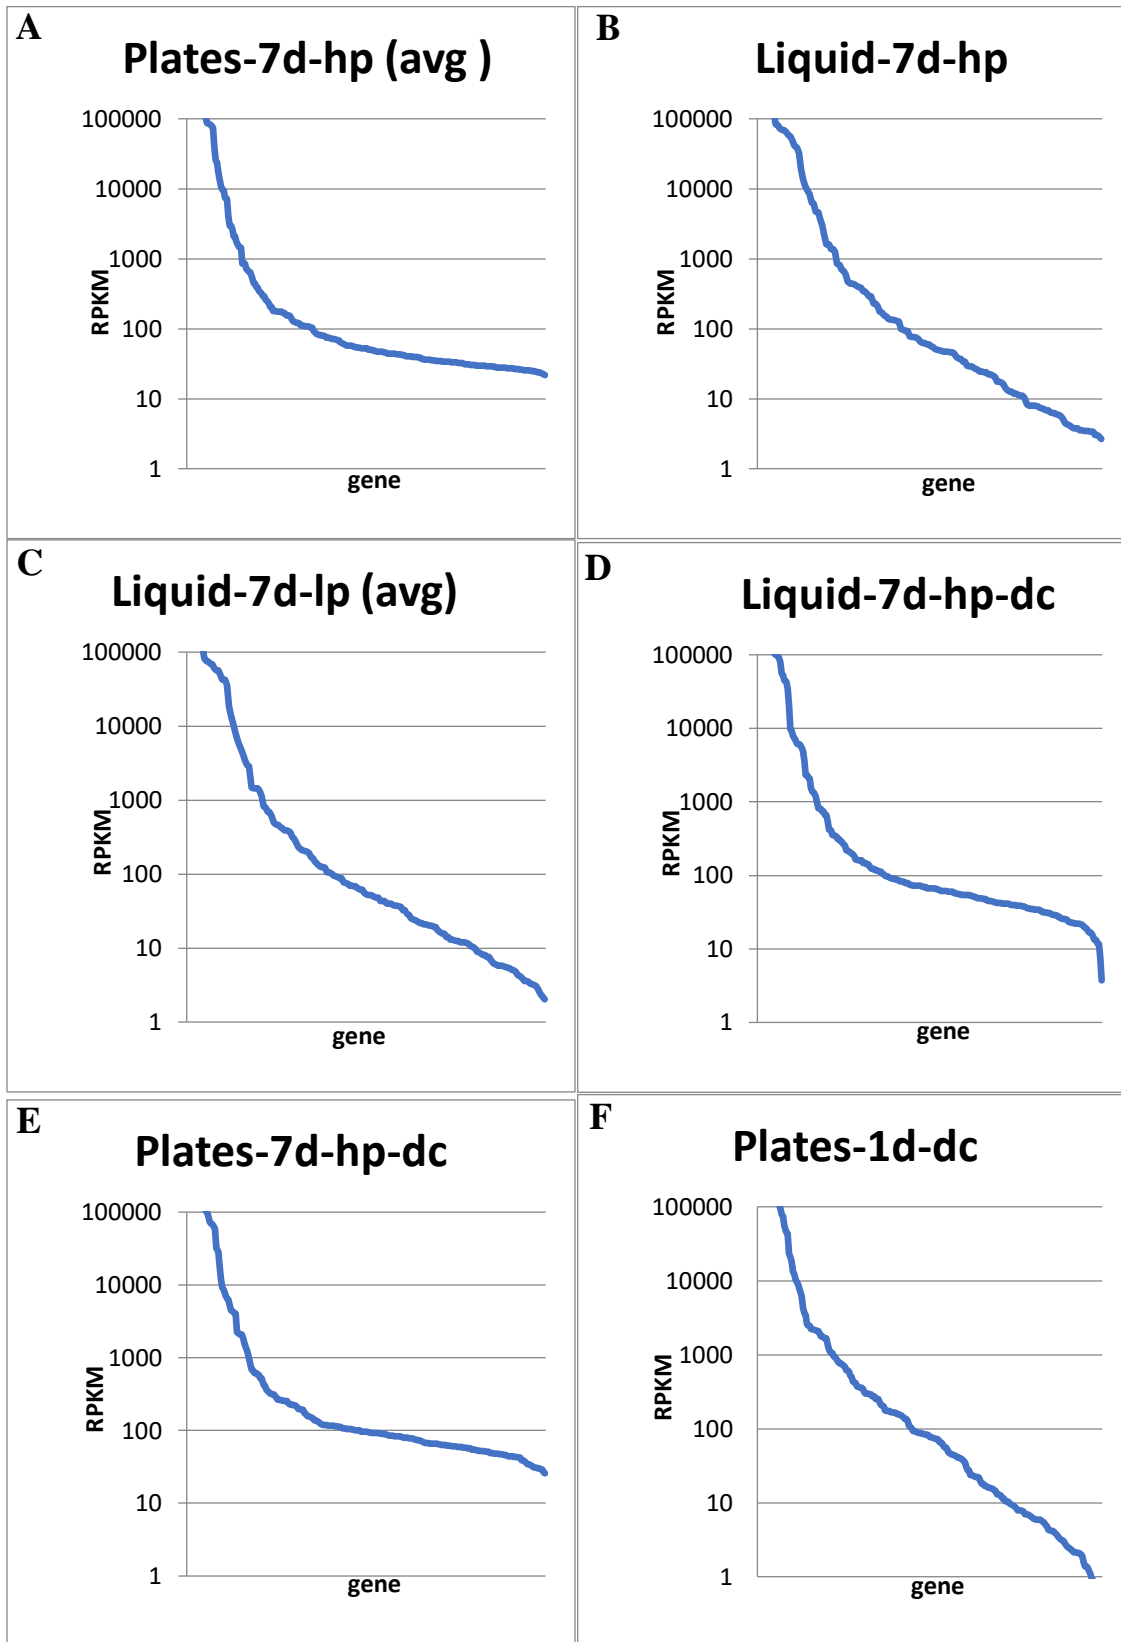

121

122

123



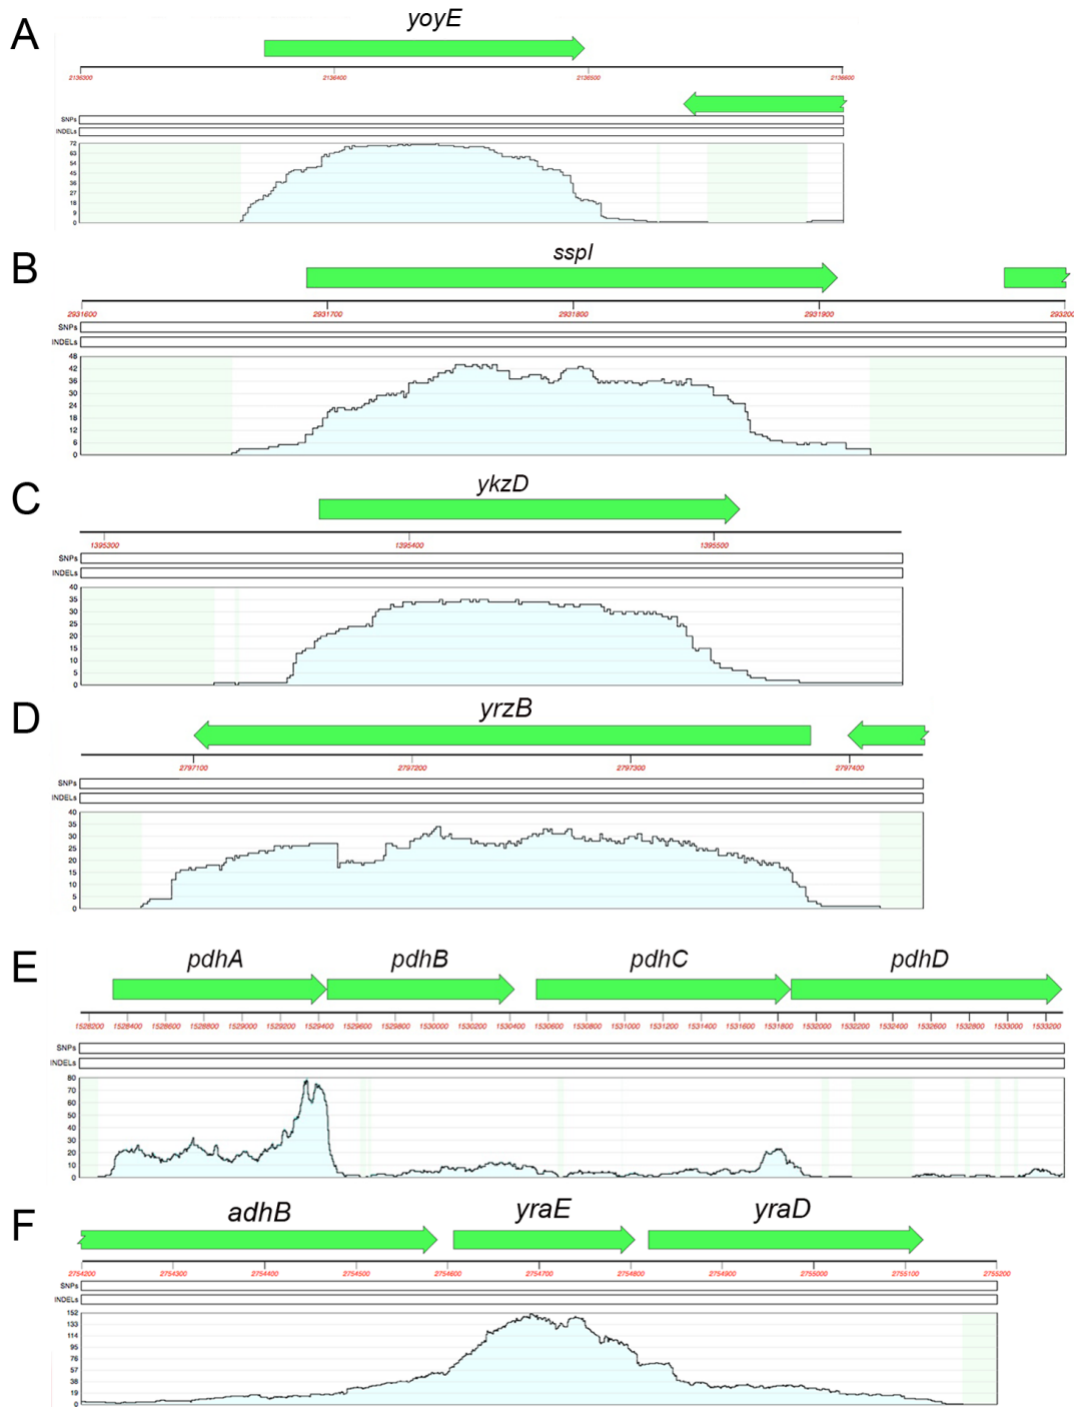

126 Fig. S3

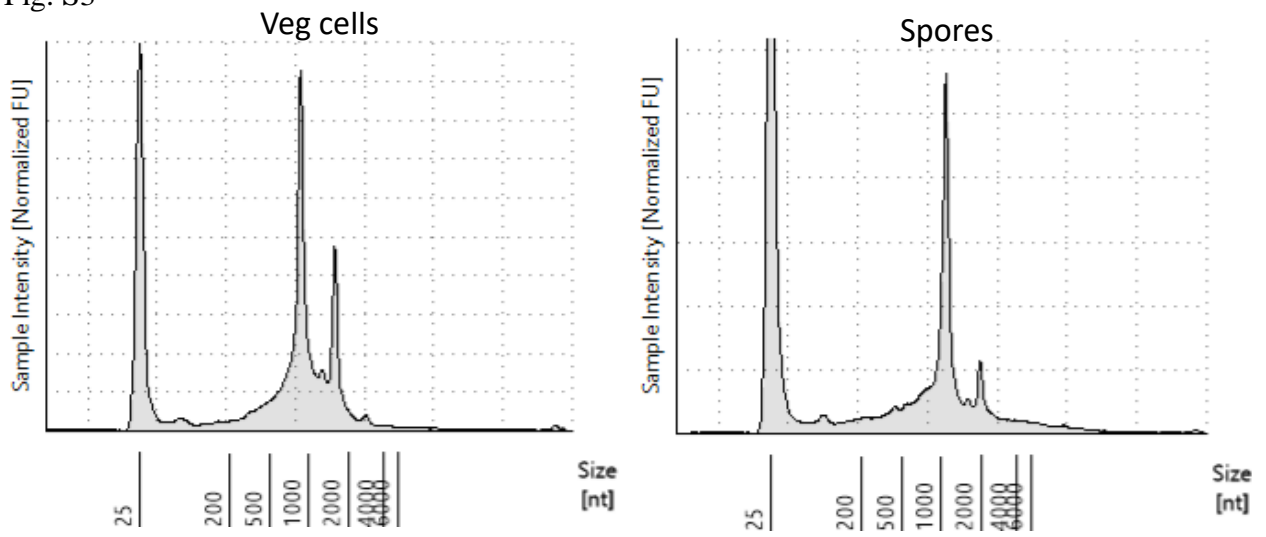

127  
128
